# Supplementary material for: Synthesis of heterobifunctional poly(ethylene glycol)s by an acetal protection method
Source: Royal Society of Chemistry journal article supplement (doi:10.1039/c0py00310g), 2010-01-01
Supplement: c0py00310g.pdf [file c0py00310g.pdf]

Supporting information for:

## Synthesis of Heterobifunctional Poly(ethylene glycol)s by an Acetal Protection Method

Zhongyu Li, Ying Chau\*

*Department of Chemical and Biomolecular Engineering, the Hong Kong University of Science and Technology, Clear Water Bay, Hong Kong SAR, China*

\*Corresponding author. Tel.: +852-2358 8935; Fax: +852-2358 0054

Email address: [ying.chau@ust.hk](mailto:ying.chau@ust.hk)

### Materials and Methods

#### Materials

All starting compounds were used as received without additional purification except for those specified. Chemicals were purchased from Aldrich unless otherwise indicated. Tetrahydrofuran (THF) (Merck, 99%) was refluxed over sodium wire and distilled from sodium naphthalenide solution. Dimethyl sulfoxide (DMSO) (Merck, 98%) was distilled over CaH<sub>2</sub> under reduced pressure just before use. Ethylene oxide (EO, 99.7%) was purchased from Hong Kong Special Gas Company and used directly. Diphenylmethylpotassium (DPMK) was prepared as described elsewhere (1).

#### Analytical Methods

<sup>1</sup>H NMR spectra were obtained on a DMX 500 MHz spectrometer with tetramethylsilane (TMS) as

the internal standard and  $\text{CDCl}_3$  as the solvent. Size exclusion chromatography (SEC) was performed in 0.1 M  $\text{NaNO}_3$  at  $40^\circ\text{C}$  with an elution rate of 0.5 mL/min on a Waters HPLC system with a G1310A pump and a G1362A refractive index (RI) detector. Ultrahydrogel 250 (Waters) and Ultrahydrogel 1000 (Waters) columns in series were calibrated by polyethylene glycol standard (Polymer Source, Inc., Canada). MALDI-TOF MS spectra were recorded using Bruker REFLEX III. R-Cyano-4-hydroxycinnamic acid (CHCA) was used as the matrix for the ionization operated in the reflection mode. Elemental analysis was recorded on an Elementar (*Vario EL-III*, Germany).

## Experimental Part

### 10 Synthesis of 2-(1-ethoxyethoxy) ethanol (EEE) (1)

Scheme 1 shows the synthesis procedure of EEE, which is adapted from Fitton's report (2). To a magnetically stirred solution of ethylene glycol (12.4 g, 0.20 mol) and ethyl vinyl ether (23 mL, 0.24 mol) in ethyl ether (150 mL) kept at  $0^\circ\text{C}$  in icy water bath, *p*-toluenesulfonic acid (TsOH) (0.6 g) was added in aliquots. The mixture was stirred for 6 h at the same temperature before  
15 saturated  $\text{NaHCO}_3$  solution (100mL) was added. The organic layer was separated, dried and evaporated under reduced pressure. A colorless liquid (1) was obtained after purification by column chromatography (silicon oxide as stationary phase and ethyl ether/hexane = 5/2 as eluent) and distillation (14.7 g, yield=55%).  $^1\text{H}$  NMR (ppm) ( $\text{CDCl}_3$ ): 1.17 (m,  $\text{CH}_3\text{CH}_2\text{O}-$ ), 1.30 (d,  $-\text{O}-\text{CH}(\text{CH}_3)-\text{O}-$ ), 3.44 (m,  $\text{CH}_3\text{CH}_2\text{O}-$ ), 3.61(m,  $-\text{CH}_2\text{CH}_2\text{OH}$ ), 3.79 (m,  $-\text{CH}_2\text{CH}_2\text{OH}$ ), 4.68 (m,  $-\text{O}-$   
20  $\text{CH}(\text{CH}_3)-\text{O}-$ ) (Fig. 1). Elemental analysis: calculated: C 53.71, H 10.52; found: C 53.65 H 10.56.

### Synthesis of ethoxyethoxy-polyethylene glycol-OH (EE-PEG-OH) (3)

A 150 mL stainless steel kettle was vacuumed at  $80^\circ\text{C}$  for 24 h and cooled to room temperature and then to  $-20^\circ\text{C}$ . Anhydrous 2-(1-ethoxyethoxy)ethanol (EEE) (1.34 g, 0.01mol) was dissolved in 40 mL of mixed solvents of DMSO and THF (v/v: 3/2). A solution of DPMK in THF (6.7 mL,  
25 0.6 M solution) was slowly added. The orange-red color of DPMK was changed to yellow when alkoxide was formed. The homogeneous initiator solution obtained was introduced into the cooled kettle by a syringe, followed by the addition of EO (40 g, 0.91 mol). After the solution was stirred at  $50^\circ\text{C}$  for 24 h, polymerization was terminated by adding of a few drops of acidified methanol

(0.1 N HCl in methanol). All the solvents were removed by reduced distillation. The crude product was dissolved in CH<sub>2</sub>Cl<sub>2</sub>, filtered, and dried over anhydrous MgSO<sub>4</sub>, then precipitated in diethyl ether. EE-PEG-OH was obtained as a white powder (yield= 98-99%).

#### Synthesis of ethoxyethoxy-PEG-alkyne (EE-PEG-alkyne) (4)

5 Synthesis of EE-PEG-alkyne was according to a previously reported method (3) (Scheme 2). Two grams of EE-PEG-OH ( $M_n = 3.81 \times 10^3$  g/mol, 0.52 mmol) with moisture removed by azeotropic distillation with toluene just before use, was mixed with 0.15 g of NaH (0.63 mmol) in 10 mL of anhydrous THF under nitrogen atmosphere at room temperature for 1 h. Then 0.070 g of propargyl bromide (0.59 mmol) was added at room temperature and the reaction was continued for 24 h.  
10 After neutralization by 0.1 N HCl, the solvent was removed by rotary evaporation. The crude product was dissolved in water and extracted by CH<sub>2</sub>Cl<sub>2</sub> (3  $\times$  50 mL). The combined organic layer was dried over MgSO<sub>4</sub>, filtered, and concentrated. The polymer was precipitated from an excess volume of diethyl ether twice to afford a white powder (1.90 g, yield = 95%).  $M_n$  (<sup>1</sup>H NMR) =  $3.86 \times 10^3$  g/mol; SEC:  $M_n = 3.83 \times 10^3$  g/mol,  $M_w/M_n = 1.09$ .

#### 15 Synthesis of HO-PEG-alkyne (5)

HO-PEG-alkyne was prepared by the hydrolysis of ethoxyethyl group on EE-PEG-alkyne using the method adapted from our previous report (1). One gram of EE-PEG-alkyne ( $M_n = 3.86 \times 10^3$  g/mol, 0.26 mmol) was mixed with 20 mL of formic acid. The solution was stirred at room temperature for 2 h and formic acid was removed by evaporation. After the residue was dissolved  
20 in a mixture of dioxane (20 mL) and methanol (10mL), KOH (1 N) aqueous solution was added until the pH reached 12.0. The mixture was refluxed at 65 °C for 24 h and neutralized with 1N HCl aqueous solution. After the solvents were removed under reduced pressure, the residue was dissolved in CH<sub>2</sub>Cl<sub>2</sub>, dried over anhydrous MgSO<sub>4</sub>, filtered, and concentrated. The polymer was precipitated from an excess volume of diethyl ether twice to afford a white powder (0.92 g, yield =  
25 92%).  $M_n$  (<sup>1</sup>H NMR) =  $3.79 \times 10^3$  g/mol; SEC:  $M_n = 3.82 \times 10^3$  g/mol,  $M_w/M_n = 1.09$ .

#### Synthesis of HS-PEG-alkyne (6)

HS-PEG-alkyne was synthesized by the esterification (3, 4) between HO-PEG-alkyne and 3-

mercaptopropionic acid. Half gram of HO-PEG-alkyne ( $M_n = 3.79 \times 10^3$  g/mol, 0.13 mmol) was dissolved in 10 mL toluene, then 0.016 g 3-mercaptopropionic acid (MPA) (0.15 mmol) along with  $\text{HfCl}_4 \cdot 2\text{THF}$  (1 mg, 0.002 mmol) were added and stirred at 50 °C under nitrogen. The reaction flask was equipped with an azeotropic distillation apparatus and the mixture was refluxed at 110 °C under nitrogen for 24 h. Toluene was removed under reduced pressure. The crude product was dissolved in  $\text{CH}_2\text{Cl}_2$ , dried over anhydrous  $\text{MgSO}_4$ , filtered, and concentrated. The polymer was precipitated from an excess volume of diethyl ether twice to afford a white powder (0.44 g, yield = 88%).  $M_n$  ( $^1\text{H}$  NMR) =  $3.91 \times 10^3$  g/mol; SEC:  $M_n = 3.86 \times 10^3$  g/mol,  $M_w/M_n = 1.09$ .

## 10 Reference

- (1) Z. Y. Li, P. P. Li, and J. L. Huang, *J. Polym. Sci., Part A: Polym. Chem.*, 2006, **44**, 4361-4371.
- (2) A. O. Fitton, J. Hill, D. E. Jane, and R. Millar, *Synthesis*, 1987, 1140-1142.
- (3) Z. Y. Li and Y. Chau, *Bioconjugate Chem.*, 2009, **20**, 780-789.
- (4) D. C. Wan, H. T. Pu, and G. J. Yang, *React. Funct. Polym.*, 2008, **68**, 431-435.
